# Supplementary material
Source: MDPI journal article supplement (https://www.mdpi.com/search?q=antibiotics-10-00148)
Supplement: s001 [file antibiotics-10-00148-s001.pdf]

## SUPPORTING INFORMATION

### Farnesane-type sesquiterpenoids with antibiotic activity from *Chiliadenus lopadusanus*

Marco Masi<sup>1,†</sup>, Emanuela Roscetto<sup>2,†</sup>, Alessio Cimmino<sup>1,\*</sup>, Maria Rosaria Catania<sup>2</sup>, Giuseppe Surico<sup>3</sup> and Antonio Evidente<sup>1</sup>

<sup>1</sup> Dipartimento di Scienze Chimiche, Università di Napoli Federico II, Complesso Universitario Monte S. Angelo, Via Cintia 4, 80126 Napoli, Italy; [marco.masi@unina.it](mailto:marco.masi@unina.it) (M.M.); [evidente@unina.it](mailto:evidente@unina.it) (A.E.)

<sup>2</sup> Dipartimento di Medicina Molecolare e Biotecnologie Mediche, Università di Napoli Federico II, Via Pansini 5, 80131 Napoli, Italy; [emanuela.roschetto@unina.it](mailto:emanuela.roschetto@unina.it) (E.R.); [mariarosaria.catania@unina.it](mailto:mariarosaria.catania@unina.it) (M.R.C.)

<sup>3</sup> Dipartimento di Scienze e Tecnologie Agrarie, Alimentari, Ambientali e Forestali, Sez. Patologia vegetale ed entomologia, Università di Firenze, Piazzale delle Cascine 28, 50144 Firenze, Italy; [giuseppe.surico@unifi.it](mailto:giuseppe.surico@unifi.it)

<sup>†</sup> These authors equally contribute to this work and are listed in alphabetical order

\*Correspondence: [alessio.cimmino@unina.it](mailto:alessio.cimmino@unina.it) ; Tel.: (+39 081 2532126)

Received: date; Accepted: date; Published: date

**Abstract:** *Chiliadenus lopadusanus* Brullo is an Asteraceae plant species endemic to Lampedusa island, the largest island of the Pelage archipelago. The organic extract of leaves, showing an antibiotic activity against Gram-positive and Gram-negative bacteria, was bioguided and purified affording three main farnesane-type sesquiterpenoids. They were identified by spectroscopic methods (essentially 1D and 2D <sup>1</sup>H and <sup>13</sup>C NMR and ESIMS data) as the (*E*)-3,7,11-trimethyldodeca-1,6,10-triene-3,9-diol, (*E*)-10-hydroxy-2,6,10-trimethyldodeca-2,6,11-trien-4-one, and (*E*)-10-hydroxy-2,6,10-trimethyl-dodeca-6,11-dien-4-one, commonly named 9-hydroxynerolidol, 9-oxonerolidol, and chiliadenol B, respectively. These three sesquiterpenes, isolated for the first time from *C. lopadusanus*, were tested on important nosocomial pathogens showing antibacterial and antibiofilm activities. This plant could be used as a source to isolate secondary metabolites as potential new antibiotics.

**Keywords:** *chiliadenus lopadusanus*; sesquiterpenes; antibacterial activity, antibiofilm activity

## Supporting Information List

- Page 3: **Figure S1.**  $^1\text{H}$  NMR spectrum of 9-hydroxynerolidol, **1** ( $\text{CDCl}_3$ , 400 MHz).
- Page 3: **Figure S2.**  $^{13}\text{C}$  NMR spectrum of 9-hydroxynerolidol, **1** ( $\text{CDCl}_3$ , 100 MHz).
- Page 4: **Figure S3.** COSY spectrum of 9-hydroxynerolidol, **1** ( $\text{CDCl}_3$ , 400 MHz).
- Page 4: **Figure S4.** HSQC spectrum of 9-hydroxynerolidol, **1** ( $\text{CDCl}_3$ , 400/100 MHz).
- Page 5: **Figure S5.** HMBC spectrum of 9-hydroxynerolidol, **1** ( $\text{CDCl}_3$ , 400/100 MHz).
- Page 5: **Figure S6.** NOESY spectrum of 9-hydroxynerolidol, **1** ( $\text{CDCl}_3$ , 400 MHz).
- Page 6: **Figure S7.** ESIMS spectrum of 9-hydroxynerolidol, **1**, recorded in positive modality.
- Page 6: **Figure S8.**  $^1\text{H}$  NMR spectrum of 9-oxonerolidol, **2** ( $\text{CDCl}_3$ , 400 MHz).
- Page 7: **Figure S9.**  $^{13}\text{C}$  NMR spectrum of 9-oxonerolidol, **2** ( $\text{CDCl}_3$ , 100 MHz).
- Page 7: **Figure S10.** COSY spectrum of 9-oxonerolidol, **2** ( $\text{CDCl}_3$ , 400 MHz).
- Page 8: **Figure S11.** HSQC spectrum of 9-oxonerolidol, **2** ( $\text{CDCl}_3$ , 400/100 MHz).
- Page 8: **Figure S12.** HMBC spectrum of 9-oxonerolidol, **2** ( $\text{CDCl}_3$ , 400/100 MHz).
- Page 9: **Figure S13.** NOESY spectrum of 9-oxonerolidol, **2** ( $\text{CDCl}_3$ , 400 MHz).
- Page 9: **Figure S14.** ESIMS spectrum of 9-oxonerolidol, **2**, recorded in positive modality.
- Page 10: **Figure S8.**  $^1\text{H}$  NMR spectrum of chiliadenol B, **3** ( $\text{CDCl}_3$ , 400 MHz).
- Page 10: **Figure S9.**  $^{13}\text{C}$  NMR spectrum of chiliadenol B, **3** ( $\text{CDCl}_3$ , 100 MHz).
- Page 11: **Figure S10.** COSY spectrum of chiliadenol B, **3** ( $\text{CDCl}_3$ , 400 MHz).
- Page 11: **Figure S11.** HSQC spectrum of chiliadenol B, **3** ( $\text{CDCl}_3$ , 400/100 MHz).
- Page 12: **Figure S12.** HMBC spectrum of chiliadenol B, **3** ( $\text{CDCl}_3$ , 400/100 MHz).
- Page 12: **Figure S13.** NOESY spectrum of chiliadenol B, **3** ( $\text{CDCl}_3$ , 400 MHz).
- Page 13: **Figure S14.** ESIMS spectrum of chiliadenol B, **3**, recorded in positive modality.
- Page 13: **Table S1.**  $^1\text{H}$  and  $^{13}\text{C}$  NMR data of 9-hydroxynerolidol (**1**).
- Page 14: **Table S2.**  $^1\text{H}$  and  $^{13}\text{C}$  NMR data of 9-oxonerolidol (**2**).
- Page 14: **Table S3.**  $^1\text{H}$  and  $^{13}\text{C}$  NMR data of chiliadenol B (**3**).



**Figure S1.**  $^1\text{H}$  NMR spectrum of 9-hydroxynerolidol, **1** ( $\text{CDCl}_3$ , 400 MHz).



**Figure S2.**  $^{13}\text{C}$  NMR spectrum of 9-hydroxynerolidol, **1** ( $\text{CDCl}_3$ , 100 MHz).



**Figure S3.** COSY spectrum of 9-hydroxynerolidol, **1** (CDCl<sub>3</sub>, 400 MHz).



**Figure S4.** HSQC spectrum of 9-hydroxynerolidol, **1** (CHCl<sub>3</sub>, 400/100 MHz).



Figure S5. HMBC spectrum of 9-hydroxynerolidol, **1** ( $\text{CHCl}_3$ , 400/100 MHz).



Figure S6. NOESY spectrum of 9-hydroxynerolidol, **1** ( $\text{CDCl}_3$ , 400 MHz).



**Figure S7.** ESIMS spectrum of 9-hydroxynerylidol, **1**, recorded in positive modality.



**Figure S8.**  $^1\text{H}$  NMR spectrum of 9-oxonerylidol, **2** ( $\text{CDCl}_3$ , 400 MHz).



**Figure S9.**  $^{13}\text{C}$  NMR spectrum of 9-oxonerolidol, **2** ( $\text{CDCl}_3$ , 100 MHz).



**Figure S10.** COSY spectrum of 9-oxonerolidol, **2** ( $\text{CDCl}_3$ , 400 MHz).



**Figure S11.** HSQC spectrum of 9-oxonerolidol, **2** ( $\text{CDCl}_3$ , 400/100 MHz).



**Figure S12.** HMBC spectrum of 9-oxonerolidol, **2** ( $\text{CDCl}_3$ , 400/100 MHz).



**Figure S13.** NOESY spectrum of 9-oxonerolidol, **2** (CDCl<sub>3</sub>, 400 MHz).



**Figure S14.** ESIMS spectrum of 9-oxonerolidol, **2**, recorded in positive modality.



**Figure S15.**  $^1\text{H}$  NMR spectrum of chiliadenol B, **3** ( $\text{CDCl}_3$ , 400 MHz).



**Figure S16.**  $^{13}\text{C}$  NMR spectrum of chiliadenol B, **3** ( $\text{CDCl}_3$ , 100 MHz).



Figure S17. COSY spectrum of chiliadenol B, **3** (CDCl<sub>3</sub>, 400 MHz).



Figure S18. HSQC spectrum of chiliadenol B, **3** (CDCl<sub>3</sub>, 400/100 MHz).



Figure S19. HMBC spectrum of chiliadenol B, **3** (CDCl<sub>3</sub>, 400/100 MHz).



Figure S20. NOESY spectrum of chiliadenol B, **3** (CDCl<sub>3</sub>, 400 MHz).



**Figure S21.** ESIMS spectrum of chiliadenol **B**, **3** recorded in positive modality.

**Table S1.**  $^1\text{H}$  and  $^{13}\text{C}$  NMR data of 9-hydroxynerolidol (**1**)<sup>a,b</sup>.

| Position        | $\delta\text{C}^c$ | $\delta\text{H}$ (J in Hz)                 | HMBC                                        |
|-----------------|--------------------|--------------------------------------------|---------------------------------------------|
| 1               | 111.7 t            | 5.08 dd (10.7, 1.2)<br>5.23 dd (17.2, 1.2) | Me-15,                                      |
| 2               | 144.9 d            | 5.93 dd (17.2, 10.7)                       | H-1A, Me-15                                 |
| 3               | 73.4 s             | -                                          | H <sub>2</sub> -1                           |
| 4               | 41.8 t             | 2.10 (2H) m                                | H-2, Me-15                                  |
| 5               | 22.9 t             | 1.60 (2H) m                                |                                             |
| 6               | 127.5 d            | 5.29 br t (7.3)                            | H <sub>2</sub> -4, H <sub>2</sub> -8, Me-14 |
| 7               | 134.6 s            | -                                          | H-9, Me-14                                  |
| 8               | 48.1 t             | 2.02 (2H) m                                | H-6, Me-14                                  |
| 9               | 66.0 d             | 4.66 ddd (11.8, 8.5, 2.7)                  |                                             |
| 10              | 128.4 d            | 5.17 br dd (8.5, 1.3)                      | H <sub>2</sub> -8                           |
| 11              | 131.8 s            | -                                          | H-9                                         |
| 12 <sup>d</sup> | 25.7 q             | 1.74 s                                     |                                             |
| 13 <sup>d</sup> | 18.1 q             | 1.71 s                                     |                                             |
| 14              | 16.2 q             | 1.68 s                                     |                                             |
| 15              | 27.9 q             | 1.30 s                                     |                                             |

<sup>a</sup> The chemical shifts are in  $\delta$  values (ppm) from TMS. <sup>b</sup> 2D  $^1\text{H}$ ,  $^1\text{H}$  (COSY)  $^{13}\text{C}$ ,  $^1\text{H}$  (HSQC) NMR experiments delineated the correlations of all the protons and the corresponding carbons. <sup>c</sup> Multiplicities were assigned by the DEPT spectrum. <sup>d</sup> The signals of the two methyl groups could be exchanged.

**Table S2.**  $^1\text{H}$  and  $^{13}\text{C}$  NMR data of 9-oxonerolidol (**2**)<sup>a,b</sup>.

| Position        | $\delta\text{C}_c$ | $\delta\text{H}$ (J in Hz)           | HMBC                              |
|-----------------|--------------------|--------------------------------------|-----------------------------------|
| 1               | 111.5 t            | 5.09 br d (10.5)<br>5.26 br d (17.5) |                                   |
| 2               | 144.5 d            | 5.94 dd (10.5, 17.5)                 | H-1A, H-4, H-15                   |
| 3               | 73.0 s             | -                                    | H <sub>2</sub> -1, H-2            |
| 4               | 41.3 t             | 1.62 (2H) m                          | Me-15                             |
| 5               | 22.9 t             | 2.10 (2H) m                          |                                   |
| 6               | 122.4 d            | 5.29 br t (7.0)                      |                                   |
| 7               | 129.9 s            | -                                    |                                   |
| 8               | 55.3 t             | 3.06 (2H) s                          | Me-14,<br>H <sub>2</sub> -8, H-10 |
| 9               | 199.2 s            | -                                    |                                   |
| 10              | 129.1 d            | 6.11 s                               | H <sub>2</sub> -8                 |
| 11              | 155.7 s            | -                                    |                                   |
| 12 <sup>d</sup> | 27.5 q             | 1.90 s                               | Me-13                             |
| 13 <sup>d</sup> | 20.4 q             | 2.16 s                               | Me-12                             |
| 14              | 16.3 q             | 1.63 s                               | H <sub>2</sub> -8                 |
| 15              | 27.9 q             | 1.31 s                               |                                   |

<sup>a</sup> The chemical shifts are in  $\delta$  values (ppm) from TMS. <sup>b</sup> 2D  $^1\text{H}$ ,  $^1\text{H}$  (COSY)  $^{13}\text{C}$ ,  $^1\text{H}$  (HSQC) NMR experiments delineated the correlations of all the protons and the corresponding carbons. <sup>c</sup> Multiplicities were assigned by the DEPT spectrum. <sup>d</sup> The signals of the two methyl groups could be exchanged.

**Table S3.**  $^1\text{H}$  and  $^{13}\text{C}$  NMR data of chiliadenol B (**3**)<sup>a,b</sup>.

| Position        | $\delta\text{C}_c$ | $\delta\text{H}$ (J in Hz)           | HMBC                                                    |
|-----------------|--------------------|--------------------------------------|---------------------------------------------------------|
| 1               | 111.8 t            | 5.10 br d (10.7)<br>5.26 br d (17.3) | Me-15                                                   |
| 2               | 144.8 d            | 5.94 dd (10.7, 17.3)                 | H-1A, H <sub>2</sub> -4, Me-15                          |
| 3               | 73.0 s             | -                                    | H <sub>2</sub> -1, H-2, Me-15                           |
| 4               | 41.4 t             | 1.67 (2H) m                          | H <sub>2</sub> -5, Me-15                                |
| 5               | 22.7 t             | 2.10 (2H) m                          | H-6, H <sub>2</sub> -4                                  |
| 6               | 129.4 d            | 5.28 t (7.3)                         | H <sub>2</sub> -8, H <sub>2</sub> -5, H <sub>2</sub> -4 |
| 7               | 128.9 s            | -                                    | H-6, Me-14                                              |
| 8               | 54.0 t             | 3.04 (2H) s                          | H-6, Me-14                                              |
| 9               | 209.4 s            | -                                    | H <sub>2</sub> -8, H <sub>2</sub> -10, Me-14            |
| 10              | 50.4 t             | 2.30 d (2H) (6.7)                    | H-11, Me-12/Me-13                                       |
| 11              | 24.2 t             | 2.14 m                               | H-10, Me-12/Me-13                                       |
| 12 <sup>d</sup> | 22.6 q             | 0.93 br s                            | H-10, H-11, Me-13                                       |
| 13 <sup>d</sup> | 22.6 q             | 0.91 br s                            | H-10, H-11, Me-12                                       |
| 14              | 16.3 q             | 1.62 s                               | H <sub>2</sub> -8, H-6                                  |
| 15              | 27.9 q             | 1.31 s                               | H-2                                                     |

<sup>a</sup> The chemical shifts are in  $\delta$  values (ppm) from TMS. <sup>b</sup> 2D  $^1\text{H}$ ,  $^1\text{H}$  (COSY)  $^{13}\text{C}$ , 1H (HSQC) NMR experiments delineated the correlations of all the protons and the corresponding carbons. <sup>c</sup> Multiplicities were assigned by the DEPT spectrum. <sup>d</sup> The carbon signals of these two methyl groups are overlapped, while their proton could be exchanged.
